# Supplementary material
Source: ML conference proceedings conference paper supplement (https://openaccess.thecvf.com/content/ICCV_2017/html/Wu_Anticipating_Daily_Intention_ICCV_2017_paper.html)
Supplement: Supplementary file 1 [file Wu_Anticipating_Daily_Intention_ICCV_2017_supplemental.pdf]

# Anticipating Daily Intention using On-Wrist Motion Triggered Sensing Supplementary Material

Tz-Ying Wu,\* Ting-An Chien,\* Cheng-Sheng Chan, Chan-Wei Hu, Min Sun

Dept. of Electrical Engineering,  
National Tsing Hua University, Taiwan.

{gina9726, tingan0206, james121506, huchanwei1204, aliensunmin}@gmail.com

In this supplementary material, we provide a video showing some typical experiment results, derivation of policy loss, design of reward function, quantitative results of policy network, the confusion matrix on intention classification and the detailed information of our datasets.

## 1. Video Example.

In this video<sup>1</sup>, we show two typical examples of our triggered results. Motion information is consistently observed, while the policy network parsimoniously triggers the process of visual observation to reduce computation requirement. Note that we use monochrome and colored frame to represent non-triggered and triggered moment respectively.

## 2. Derivation of Policy Loss.

Given a set of actions  $A$ ,  $\pi(a | o_t^k; W_p)$  is a distribution parameterized by  $W_p$  over  $a \in A$  to sample actions, where  $o_t^k = (h_t^k, f_{m,t}^k)$  is the observation of the policy network.  $h_t^k$  and  $f_{m,t}^k$  can be referred to Eq. 2 and Sec. 3.1 in the main paper respectively.  $R(a)$  is the reward related to the action  $a$ . The expected reward can be expressed as

$$E_a[R(a)] = \sum_{a \in A} \pi(a | o_t^k; W_p) \cdot R(a) \quad (1)$$

The objective of policy gradient is to find the optimal policy (i.e., the optimal  $W_p$ ) that can maximize the expected reward of a sequence of action output.

The gradient of the expectation  $\nabla_{W_p}$  (referred to as  $\nabla$ )

can be derived as follows,

$$\begin{aligned} \nabla E_a[R(a)] &= \nabla \sum_{a \in A} \pi(a | o_t^k; W_p) \cdot R(a) \\ &= \sum_{a \in A} \nabla \pi(a | o_t^k; W_p) \cdot R(a) \\ &= \sum_{a \in A} \pi(a | o_t^k; W_p) \frac{\nabla \pi(a | o_t^k; W_p)}{\pi(a | o_t^k; W_p)} \cdot R(a) \\ &= \sum_{a \in A} \pi(a | o_t^k; W_p) \nabla \log \pi(a | o_t^k; W_p) \cdot R(a) \\ &= E_a[R(a) \cdot \nabla \log \pi(a | o_t^k; W_p)] \end{aligned} \quad (2)$$

By Monte Carlo sampling, the gradient equation can be approximated as

$$\nabla E_a[R(a)] \approx \frac{1}{KT} \sum_{k=1}^K \sum_{t=1}^T \nabla \log(\pi(a_t^k | o_t^k; W_p)) \cdot R_t^k, \quad (3)$$

where  $\{a_t^k\}_t$  is the  $k^{th}$  sequence of triggered patterns sampled from  $\pi(\cdot)$ .  $K$  is the number of sequences, and  $T$  is the time when intention reached.  $R_t^k$  is the reward of the  $k^{th}$  sampled sequence at time  $t$ .

By ascending the gradient of the expected reward with respect to  $W_p$ , we can find the optimal distribution of  $\pi(\cdot)$ . The derivative of the policy loss, therefore, can be derived as negative gradient of expected reward. We can further derive the policy loss as

$$L^P = -\frac{1}{KT} \sum_{k=1}^K \sum_{t=1}^T \log(\pi(a_t^k | (h_t^k, f_{m,t}^k); W_p)) \cdot R_t^k, \quad (4)$$

which can be referred to Eq. 10 of the main paper.

\*indicates equal contribution

<sup>1</sup>video url: [https://youtu.be/TdHSwf\\_c288](https://youtu.be/TdHSwf_c288)

Table 1. Validation on different reward setting.

| observation |       | 25%      |        | 50%      |        | 75%      |        | 100%     |        |
|-------------|-------|----------|--------|----------|--------|----------|--------|----------|--------|
| $R^+$       | $R^-$ | Accuracy | Ratio  | Accuracy | Ratio  | Accuracy | Ratio  | Accuracy | Ratio  |
| 10          | -10   | 89.60%   | 38.02% | 92.82%   | 39.86% | 95.13%   | 41.33% | 95.70%   | 42.11% |
| 100         | -100  | 88.77%   | 32.31% | 93.23%   | 32.36% | 94.88%   | 31.11% | 95.79%   | 30.10% |
| 1000        | -1000 | 88.36%   | 39.22% | 92.32%   | 42.10% | 94.05%   | 41.95% | 94.80%   | 40.83% |

### 3. Design of Reward Function.

As mentioned in Sec. 4.2.1 in our main paper, we further ask a user (referred to as user A) to record multiple samples, and use them as our validation set to choose the reward setting. In Table. 1, we show that the change of the reward setting rarely affects the performance of intention prediction, while the action ratio of  $R^+ = 100$  and  $R^- = -100$  is much lower than others. Thus, we choose this reward setting as our final decision.

### 4. Quantitative Result of Policy Network

**Comparison with uniform sampling policy** For a fair comparison, we use a uniform sampling policy with a target trigger ratio similar to our method to train a new model. We found that uniform sampling is about 4% and 8% lower in accuracy than our method when observing 100% and 25% of the video respectively.

**Analysis of triggered actions** To verify the effectiveness of our triggered moment, we annotate the action of each triggered time stamp. The candidate actions are listed in the data collection stage (see Table. 3) for guiding the user to complete an intention. Note that this list may not include all the subtle actions in the video. Annotators are asked to choose the most similar action among the candidate actions or choose "others" if they think these actions are all uncorrelated to this time stamp. The ratio of "others" over triggered time stamps is 26% in average among three users, which contains meaningless or unlisted actions. This shows that most of our triggered time stamps contain valid information.

### 5. Confusion matrix on intention classification

In our dataset, an action may lead to different intentions. For example, the intentions encompassing the action "pick up the cellphone" are "cellphone charging", "talk on the cellphone", "use cellphone", "listen to music by cellphone", and "go outside". The average accuracy of each of them among three users achieves 83%, 100%, 100%, 100%, 100% individually. The confusion matrix on intention classification among three users is shown in Fig. 1.

### 6. Hand Motion Dataset.

Inspired by [1], we select six motions. We ask eight users to collect 609 motion sequences from the right hand and

Figure 1. Confusion matrix on intention classification.

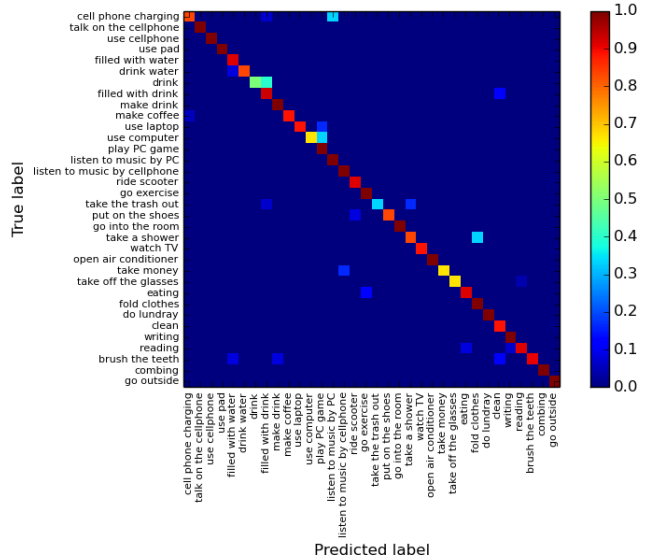

Table 2. Number of samples for each motion

| Motion     | # samples |
|------------|-----------|
| training   |           |
| lift       | 57        |
| pick up    | 55        |
| put down   | 55        |
| pull       | 51        |
| stationary | 112       |
| walking    | 279       |
| testing    |           |
| lift       | 5         |
| pick up    | 5         |
| put down   | 5         |
| pull       | 5         |
| stationary | 10        |
| walking    | 6         |

one user to collect 36 motion sequences from the left hand. Table. 2 shows the number of samples of our hand motion dataset.

### 7. Object Interaction Classes.

We select 50<sup>2</sup> object categories and collect a set of 940 videos corresponding to 909 unique object instances<sup>3</sup>. We

<sup>2</sup>including a hand-free category.

<sup>3</sup>not counting "free" as an instance.

Table 3. Candidate actions for each intention

| intention                    | candidate actions              |                                    |                                      |
|------------------------------|--------------------------------|------------------------------------|--------------------------------------|
| cellphone charging           | pick up the cellphone          | pick up the phone-charger          | plug into the socket                 |
|                              | plug into cellphone            | put down the cellphone             | others                               |
| talk on the cellphone        | pick up the cellphone          | lift the cellphone                 | others                               |
| use cellphone                | pick up the cellphone          | keep hand steady                   | others                               |
| use pad                      | pick up the pad                | keep hand steady                   | others                               |
| filled with water            | pick up the bottle             | walking                            | open the door                        |
|                              | walking                        | open the bottle                    | press the water-dispenser's button   |
|                              | pick up the cup                | others                             |                                      |
| drink water                  | pick up the bottle             | open the bottle                    | lift the bottle                      |
|                              | pick up the cup                | lift the cup                       | others                               |
| drink                        | open the refrigerator          | pick up the bottle                 | lift the bottle                      |
|                              | pick up the Tetra-Pak          | lift the Tetra-Pak                 | others                               |
| filled with drink            | open the refrigerator          | pick up the bottle                 | pick up the cup                      |
|                              | pour the drink                 | others                             |                                      |
| make drink                   | pick up the instant-package    | pick up the cup                    | walking                              |
|                              | open the door                  | press the water-dispenser's button | others                               |
| make coffee                  | pick up the cup                | put down the cup                   | plug into the socket                 |
|                              | open the coffee-machine        | others                             |                                      |
| use laptop                   | hold the laptop                | press touch panel                  | type on laptop-keyboard              |
|                              | others                         |                                    |                                      |
| use computer                 | use mouse                      | type on keyboard                   | others                               |
| play PC game                 | use mouse                      | type on keyboard                   | use joystick                         |
|                              | others                         |                                    |                                      |
| listen to music by PC        | pick up the headphone          | put on the headphone               | plug into laptop                     |
|                              | others                         |                                    |                                      |
| listen to music by cellphone | pick up the headphone          | put on the headphone               | pick up the cellphone                |
|                              | plug into cellphone            | others                             |                                      |
| ride scooter                 | pick up the helmet             | put on the helmet                  | pick up the keys                     |
|                              | open the door                  | others                             |                                      |
| go exercise                  | pick up the towel              | pick up the racket                 | pick up the shoes                    |
|                              | put on the shoes               | open the door                      | others                               |
| take the trash out           | pick up the garbage            | open the door                      | others                               |
| put on the shoes             | pick up the socks              | put on the socks                   | pick up the shoes                    |
|                              | put on the shoes               | others                             |                                      |
| go into the room             | pick up the keys               | insert the key into the lock       | wrist rotation to unlock             |
|                              | open the door                  | others                             |                                      |
| take a shower                | pick up the towel              | pick up some clothes               | pick up the plastic-wash-basin       |
|                              | open the door                  | others                             |                                      |
| watch TV                     | pick up the remote-controller  | sit down                           | lift and press the remote-controller |
|                              | pick up the bottle             | others                             |                                      |
| open air conditioner         | open the door                  | pick up the remote-controller      | lift and press the remote-controller |
|                              | others                         |                                    |                                      |
| take money                   | pick up the wallet             | open the wallet                    | take out the banknote                |
|                              | others                         |                                    |                                      |
| take off the glasses         | lift arm and touch the glasses | put down the glasses               | others                               |
| eating                       | pick up the bowl               | use chopsticks                     | use spoons                           |
|                              | others                         |                                    |                                      |
| fold clothes                 | pick up some clothes           | fold clothes                       | put down clothes                     |
|                              | others                         |                                    |                                      |
| do laundry                   | pick up laundry-basket         | open the washing machine           | open the detergent                   |
|                              | others                         |                                    |                                      |
| clean                        | pick up the broom              | sweep the floor                    | pick up the swab                     |
|                              | open the water tap             | close the water tap                | others                               |
| writing                      | pick up the pen-case           | pick up the pen                    | turn on the lamp                     |
|                              | pick up the paper              | others                             |                                      |

| intention       | candidate actions      |                        |                          |
|-----------------|------------------------|------------------------|--------------------------|
| reading         | pick up the glasses    | pick up the book       | open the book            |
|                 | turn on the lamp       | others                 |                          |
| brush the teeth | pick up the toothbrush | pick up the cup        | open the water tap       |
|                 | close the water tap    | put down the cup       | pick up the toothpaste   |
|                 | squeeze the toothpaste | others                 |                          |
| combing         | pick up the comb       | pick up the hair-dryer | switch on the hair-dryer |
|                 | others                 |                        |                          |
| go outside      | pick up the backpack   | put on the backpack    | pick up the keys         |
|                 | pick up the cellphone  | pick up the bottle     | open the door            |

collect this dataset mostly in shopping centers. Table. 4 shows all the object classes, the number of instances, and the number of frames for each category.

## 8. Daily Intention Dataset.

Table. 5 shows our 34 different daily human intentions. We list number of unique action sequences in each intention.

## References

- [1] Y. Chen and Y. Xue. A deep learning approach to human activity recognition based on single accelerometer. In *SMC*, 2015.

Table 4. Details about our object interaction dataset.

| category          | # of instances | # of frames | category        | # of instances | # of frames |
|-------------------|----------------|-------------|-----------------|----------------|-------------|
| free              | -              | 12441       | towel           | 24             | 9598        |
| cellphone         | 22             | 8466        | bowl            | 30             | 7334        |
| mouse             | 23             | 8596        | chopsticks      | 10             | 5094        |
| keyboard          | 16             | 10886       | spoon           | 12             | 5781        |
| bottle            | 73             | 16565       | lamp            | 24             | 3175        |
| hair-dryer        | 28             | 6284        | headphone       | 23             | 4221        |
| Tetra-Pak         | 29             | 11783       | book            | 29             | 5696        |
| shoes             | 38             | 6651        | clothes         | 6              | 2308        |
| cup               | 35             | 8712        | pen             | 17             | 7628        |
| instant-package   | 17             | 11727       | pen-case        | 18             | 8173        |
| coffee-machine    | 9              | 4489        | water-dispenser | 13             | 7923        |
| wallet            | 13             | 7785        | joystick        | 7              | 8161        |
| pad               | 11             | 2890        | helmet          | 20             | 6974        |
| doorknob          | 3              | 1777        | garbage         | 3              | 1899        |
| backpack          | 30             | 8830        | racket          | 11             | 6010        |
| laptop-keyboard   | 15             | 10701       | banknote        | 3              | 1877        |
| laptop            | 15             | 6852        | detergent       | 26             | 5179        |
| glasses           | 23             | 7305        | laundry-basket  | 9              | 3157        |
| keys              | 16             | 13001       | washing-machine | 24             | 2411        |
| toothbrush        | 42             | 5770        | broom           | 12             | 6623        |
| toothpaste        | 13             | 12401       | swab            | 7              | 5618        |
| remote-controller | 7              | 6777        | notebook        | 12             | 4389        |
| socks             | 11             | 5207        | water-tap       | 24             | 4675        |
| phone-charger     | 5              | 3081        | comb            | 6              | 3711        |
| fridge            | 37             | 9422        | washbowl        | 8              | 4204        |

Table 5. 34 daily human intentions.

| intention                    | # of action sequences | intention            | # of action sequences |
|------------------------------|-----------------------|----------------------|-----------------------|
| cellphone charging           | 6                     | take the trash out   | 1                     |
| talk on the cellphone        | 1                     | put on the shoes     | 2                     |
| use cellphone                | 1                     | go into the room     | 2                     |
| use pad                      | 1                     | take a shower        | 2                     |
| filled with water            | 4                     | watch TV             | 3                     |
| drink water                  | 2                     | open air conditioner | 2                     |
| drink                        | 4                     | take money           | 1                     |
| filled with drink            | 5                     | take off the glasses | 1                     |
| make drink                   | 4                     | eating               | 4                     |
| make coffee                  | 3                     | fold clothes         | 1                     |
| use laptop                   | 3                     | do laundry           | 2                     |
| use computer                 | 2                     | clean                | 3                     |
| play PC game                 | 2                     | writing              | 5                     |
| listen to music by PC        | 2                     | reading              | 8                     |
| listen to music by cellphone | 2                     | brush the teeth      | 11                    |
| ride scooter                 | 4                     | combing              | 3                     |
| go exercise                  | 3                     | go outside           | 64                    |
